# Supplementary material for: The HBx oncoprotein of hepatitis B virus potentiates cell transformation by inducing c-Myc-dependent expression of the RNA polymerase I transcription factor UBF
Source: PubMed Central journal article supplement (PMC4424551; doi:10.1186/s12985-015-0293-5), 2015-04-14
Supplement: 12985_2015_293_MOESM1_ESM.pdf [file 12985_2015_293_MOESM1_ESM.pdf]

## Supplementary data

| Primers                        | Sequence                                                           |
|--------------------------------|--------------------------------------------------------------------|
| ARPP P0 gene                   | F- 5' GCACTGGAAGTCCAACACTTC 3'<br>R- 5' TGAGGTCCTCCTTGGTGAACAC3'   |
| UBF gene                       | F- 5' AATTCAGGGAGAACCCAAG 3'<br>R- 5' TTAACCCAGAGGTCCAGGTG 3'      |
| UBF promoter<br>(ChIP primers) | F- 5' CACCCACTGATGAAGTCTATGAG 3'<br>R- 5' ACCCTTTTGAAGAGACACCAA 3' |

**Table S1.** Oligonucleotide primers used for RT-qPCR and ChIP-qPCR.

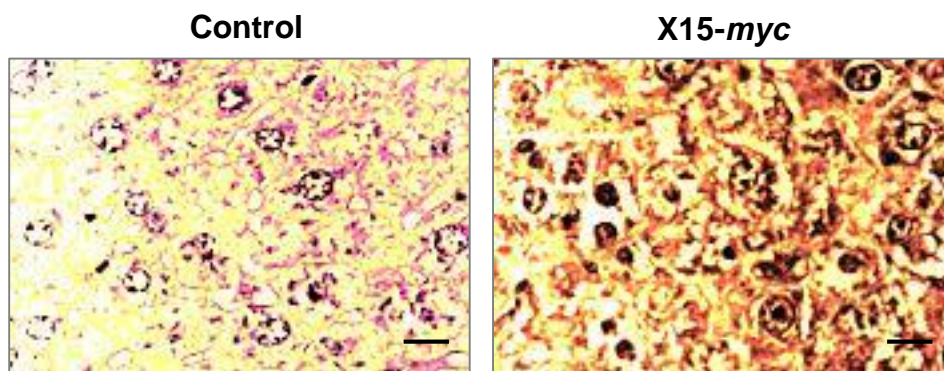

**Figure S1. Expression levels of UBF in X15- *myc* transgenic mice.** Immunohistochemical detection of UBF in the liver tissues of 6-month old control and X15-*myc* transgenic mice. (Original image magnification,  $\times 200$ ). Scale represents 10  $\mu\text{m}$ .
